# Supplementary material for: Construction of microneedle of Atractylodes macrocephala Rhizoma aqueous extract and effect on mammary gland hyperplasia based on intestinal flora
Source: Frontiers journal article supplement (doi:10.3389/fendo.2023.1158318), 2023-02-28
Supplement: Data_Sheet_1.ZIP [file Data_Sheet_1.ZIP]

## Sheet: Sheet1
Con	Mod	AM-DMN
ASV_163	ASV_320	ASV_394
ASV_280	ASV_324	ASV_446
ASV_286	ASV_456	ASV_457
ASV_298	ASV_496	ASV_487
ASV_326	ASV_545	ASV_567
ASV_363	ASV_560	ASV_693
ASV_365	ASV_663	ASV_717
ASV_366	ASV_668	ASV_749
ASV_380	ASV_682	ASV_776
ASV_386	ASV_698	ASV_791
ASV_419	ASV_703	ASV_807
ASV_420	ASV_704	ASV_851
ASV_491	ASV_719	ASV_859
ASV_509	ASV_723	ASV_863
ASV_510	ASV_725	ASV_911
ASV_514	ASV_726	ASV_982
ASV_536	ASV_743	ASV_983
ASV_544	ASV_744	ASV_993
ASV_554	ASV_748	ASV_994
ASV_575	ASV_767	ASV_1017
ASV_583	ASV_799	ASV_1073
ASV_593	ASV_842	ASV_1111
ASV_601	ASV_843	ASV_1112
ASV_613	ASV_844	ASV_1113
ASV_640	ASV_849	ASV_1114
ASV_664	ASV_857	ASV_1127
ASV_687	ASV_866	ASV_1148
ASV_701	ASV_879	ASV_1174
ASV_713	ASV_880	ASV_1191
ASV_721	ASV_897	ASV_1230
ASV_728	ASV_909	ASV_1313
ASV_737	ASV_916	ASV_1314
ASV_755	ASV_917	ASV_1358
ASV_774	ASV_918	ASV_1394
ASV_779	ASV_926	ASV_1420
ASV_812	ASV_927	ASV_1512
ASV_828	ASV_928	ASV_1513
ASV_829	ASV_933	ASV_1514
ASV_832	ASV_960	ASV_1557
ASV_834	ASV_961	ASV_1580
ASV_839	ASV_963	ASV_1581
ASV_840	ASV_968	ASV_1607
ASV_848	ASV_969	ASV_1627
ASV_853	ASV_978	ASV_1664
ASV_860	ASV_979	ASV_1665
ASV_862	ASV_989	ASV_1666
ASV_867	ASV_990	ASV_1667
ASV_871	ASV_991	ASV_1691
ASV_876	ASV_1012	ASV_1692
ASV_878	ASV_1015	ASV_1778
ASV_881	ASV_1035	ASV_1779
ASV_901	ASV_1045	ASV_1825
ASV_913	ASV_1060	ASV_1932
ASV_938	ASV_1069	ASV_1933
ASV_940	ASV_1070	ASV_1934
ASV_957	ASV_1080	ASV_1993
ASV_958	ASV_1081	ASV_1994
ASV_1001	ASV_1083	ASV_2043
ASV_1006	ASV_1084	ASV_2164
ASV_1009	ASV_1093	ASV_2228
ASV_1021	ASV_1094	ASV_2229
ASV_1032	ASV_1095	ASV_2230
ASV_1036	ASV_1096	ASV_2307
ASV_1051	ASV_1105	ASV_2308
ASV_1052	ASV_1125	ASV_2384
ASV_1065	ASV_1144	ASV_2386
ASV_1066	ASV_1159	ASV_2388
ASV_1068	ASV_1161	ASV_2479
ASV_1092	ASV_1170	ASV_2480
ASV_1104	ASV_1171	ASV_2481
ASV_1116	ASV_1172	ASV_2482
ASV_1134	ASV_1188	ASV_2563
ASV_1140	ASV_1205	ASV_2564
ASV_1153	ASV_1219	ASV_2662
ASV_1155	ASV_1223	ASV_2663
ASV_1157	ASV_1225	ASV_2785
ASV_1164	ASV_1244	ASV_2786
ASV_1167	ASV_1245	ASV_2787
ASV_1175	ASV_1246	ASV_2788
ASV_1185	ASV_1247	ASV_2789
ASV_1195	ASV_1248	ASV_2790
ASV_1199	ASV_1258	ASV_2791
ASV_1212	ASV_1271	ASV_2910
ASV_1217	ASV_1274	ASV_2911
ASV_1236	ASV_1283	ASV_2913
ASV_1237	ASV_1284	ASV_2914
ASV_1240	ASV_1285	ASV_2915
ASV_1242	ASV_1287	ASV_2916
ASV_1253	ASV_1304	ASV_3033
ASV_1255	ASV_1305	ASV_3034
ASV_1264	ASV_1306	ASV_3035
ASV_1268	ASV_1307	ASV_3036
ASV_1276	ASV_1308	ASV_3037
ASV_1278	ASV_1326	ASV_3038
ASV_1281	ASV_1328	ASV_3039
ASV_1282	ASV_1330	ASV_3040
ASV_1294	ASV_1331	ASV_3041
ASV_1295	ASV_1332	ASV_3212
ASV_1297	ASV_1333	ASV_3213
ASV_1300	ASV_1352	ASV_3214
ASV_1301	ASV_1383	ASV_3215
ASV_1317	ASV_1384	ASV_3216
ASV_1320	ASV_1385	ASV_3217
ASV_1338	ASV_1386	ASV_3218
ASV_1341	ASV_1387	ASV_3417
ASV_1342	ASV_1388	ASV_3418
ASV_1343	ASV_1389	ASV_3419
ASV_1348	ASV_1413	ASV_3420
ASV_1350	ASV_1414	ASV_3421
ASV_1359	ASV_1415	ASV_3422
ASV_1363	ASV_1417	ASV_3423
ASV_1364	ASV_1418	ASV_3424
ASV_1367	ASV_1432	ASV_3425
ASV_1368	ASV_1436	ASV_3426
ASV_1374	ASV_1456	ASV_3427
ASV_1380	ASV_1458	ASV_3428
ASV_1401	ASV_1486	ASV_3429
ASV_1405	ASV_1488	ASV_3430
ASV_1406	ASV_1489	ASV_3431
ASV_1409	ASV_1503	ASV_3432
ASV_1424	ASV_1507	ASV_3668
ASV_1426	ASV_1532	ASV_3669
ASV_1429	ASV_1551	ASV_3670
ASV_1441	ASV_1552	ASV_3671
ASV_1442	ASV_1553	ASV_3672
ASV_1447	ASV_1554	ASV_3673
ASV_1448	ASV_1555	ASV_3674
ASV_1449	ASV_1572	ASV_3675
ASV_1452	ASV_1573	ASV_3677
ASV_1453	ASV_1574	ASV_3962
ASV_1454	ASV_1575	ASV_3963
ASV_1468	ASV_1595	ASV_3964
ASV_1474	ASV_1600	ASV_3965
ASV_1475	ASV_1601	ASV_3966
ASV_1477	ASV_1602	ASV_3967
ASV_1483	ASV_1619	ASV_3969
ASV_1500	ASV_1620	ASV_3970
ASV_1525	ASV_1621	ASV_3971
ASV_1527	ASV_1623	ASV_3972
ASV_1530	ASV_1624	ASV_3974
ASV_1538	ASV_1626	ASV_3975
ASV_1539	ASV_1646	ASV_3976
ASV_1543	ASV_1647	ASV_3977
ASV_1544	ASV_1650	ASV_3978
ASV_1545	ASV_1651	ASV_3980
ASV_1546	ASV_1652	ASV_3981
ASV_1565	ASV_1653	ASV_3982
ASV_1566	ASV_1654	ASV_4244
ASV_1568	ASV_1655	ASV_4317
ASV_1571	ASV_1658	ASV_4318
ASV_1584	ASV_1659	ASV_4319
ASV_1585	ASV_1685	ASV_4320
ASV_1586	ASV_1686	ASV_4321
ASV_1592	ASV_1687	ASV_4322
ASV_1593	ASV_1688	ASV_4323
ASV_1610	ASV_1726	ASV_4324
ASV_1613	ASV_1728	ASV_4325
ASV_1616	ASV_1730	ASV_4326
ASV_1617	ASV_1731	ASV_4327
ASV_1629	ASV_1759	ASV_4328
ASV_1636	ASV_1760	ASV_4329
ASV_1637	ASV_1761	ASV_4330
ASV_1641	ASV_1762	ASV_4331
ASV_1642	ASV_1763	ASV_4332
ASV_1645	ASV_1764	ASV_4334
ASV_1672	ASV_1767	ASV_4335
ASV_1676	ASV_1768	ASV_4336
ASV_1677	ASV_1770	ASV_4337
ASV_1679	ASV_1771	ASV_4338
ASV_1699	ASV_1805	ASV_4339
ASV_1702	ASV_1808	ASV_4340
ASV_1710	ASV_1809	ASV_4341
ASV_1711	ASV_1812	ASV_4343
ASV_1716	ASV_1813	ASV_4344
ASV_1718	ASV_1814	ASV_4345
ASV_1720	ASV_1846	ASV_4346
ASV_1721	ASV_1847	ASV_4347
ASV_1741	ASV_1848	ASV_4348
ASV_1742	ASV_1849	ASV_4349
ASV_1743	ASV_1850	ASV_4796
ASV_1744	ASV_1851	ASV_4803
ASV_1746	ASV_1852	ASV_4827
ASV_1748	ASV_1853	ASV_4830
ASV_1750	ASV_1854	ASV_4831
ASV_1755	ASV_1883	ASV_4832
ASV_1785	ASV_1884	ASV_4833
ASV_1787	ASV_1885	ASV_4834
ASV_1789	ASV_1889	ASV_4835
ASV_1790	ASV_1890	ASV_4836
ASV_1792	ASV_1892	ASV_4837
ASV_1793	ASV_1920	ASV_4838
ASV_1794	ASV_1921	ASV_4839
ASV_1795	ASV_1923	ASV_4840
ASV_1797	ASV_1924	ASV_4841
ASV_1798	ASV_1925	ASV_4842
ASV_1800	ASV_1926	ASV_4843
ASV_1801	ASV_1927	ASV_4844
ASV_1802	ASV_1968	ASV_4845
ASV_1828	ASV_1970	ASV_4846
ASV_1829	ASV_1971	ASV_4847
ASV_1830	ASV_1972	ASV_4848
ASV_1831	ASV_1973	ASV_4849
ASV_1833	ASV_1974	ASV_4850
ASV_1835	ASV_1975	ASV_4851
ASV_1837	ASV_1976	ASV_4852
ASV_1838	ASV_1977	ASV_4853
ASV_1839	ASV_1980	ASV_4854
ASV_1840	ASV_1981	ASV_4855
ASV_1841	ASV_1983	ASV_4856
ASV_1843	ASV_2019	ASV_4857
ASV_1865	ASV_2022	ASV_4858
ASV_1866	ASV_2023	ASV_4859
ASV_1869	ASV_2024	ASV_4860
ASV_1870	ASV_2025	ASV_4861
ASV_1871	ASV_2026	ASV_4862
ASV_1873	ASV_2027	ASV_4863
ASV_1876	ASV_2029	ASV_4864
ASV_1877	ASV_2031	ASV_4865
ASV_1878	ASV_2032	ASV_4866
ASV_1879	ASV_2033	ASV_4867
ASV_1880	ASV_2034	ASV_4868
ASV_1881	ASV_2035	ASV_4869
ASV_1905	ASV_2073	ASV_4870
ASV_1906	ASV_2074	ASV_4872
ASV_1908	ASV_2076	ASV_4873
ASV_1909	ASV_2078	ASV_4874
ASV_1915	ASV_2079	ASV_4875
ASV_1916	ASV_2080	ASV_4876
ASV_1918	ASV_2082	ASV_4877
ASV_1939	ASV_2083	ASV_4878
ASV_1940	ASV_2086	ASV_4879
ASV_1944	ASV_2087	ASV_5488
ASV_1947	ASV_2138	ASV_5502
ASV_1949	ASV_2140	ASV_5504
ASV_1954	ASV_2141	ASV_5505
ASV_1955	ASV_2142	ASV_5506
ASV_1958	ASV_2144	ASV_5507
ASV_1959	ASV_2145	ASV_5508
ASV_1961	ASV_2146	ASV_5509
ASV_1963	ASV_2147	ASV_5510
ASV_1964	ASV_2148	ASV_5511
ASV_1965	ASV_2149	ASV_5512
ASV_2002	ASV_2151	ASV_5513
ASV_2003	ASV_2152	ASV_5515
ASV_2004	ASV_2153	ASV_5516
ASV_2008	ASV_2154	ASV_5517
ASV_2011	ASV_2155	ASV_5518
ASV_2013	ASV_2156	ASV_5519
ASV_2014	ASV_2200	ASV_5520
ASV_2015	ASV_2201	ASV_5521
ASV_2055	ASV_2202	ASV_5522
ASV_2056	ASV_2203	ASV_5523
ASV_2057	ASV_2204	ASV_5524
ASV_2058	ASV_2205	ASV_5525
ASV_2059	ASV_2206	ASV_5526
ASV_2060	ASV_2208	ASV_5527
ASV_2061	ASV_2209	ASV_5528
ASV_2062	ASV_2210	ASV_5529
ASV_2063	ASV_2211	ASV_5530
ASV_2065	ASV_2212	ASV_5531
ASV_2066	ASV_2213	ASV_5532
ASV_2067	ASV_2214	ASV_5533
ASV_2068	ASV_2215	ASV_5535
ASV_2069	ASV_2216	ASV_5536
ASV_2106	ASV_2217	ASV_5537
ASV_2109	ASV_2218	ASV_5538
ASV_2113	ASV_2219	ASV_5539
ASV_2114	ASV_2270	ASV_5540
ASV_2115	ASV_2271	ASV_5541
ASV_2117	ASV_2276	ASV_5542
ASV_2118	ASV_2277	ASV_5543
ASV_2120	ASV_2278	ASV_5544
ASV_2121	ASV_2279	ASV_5545
ASV_2122	ASV_2280	ASV_5546
ASV_2123	ASV_2282	ASV_5547
ASV_2125	ASV_2283	ASV_5548
ASV_2126	ASV_2284	ASV_5549
ASV_2128	ASV_2286	ASV_5550
ASV_2129	ASV_2287	ASV_5551
ASV_2130	ASV_2289	ASV_6238
ASV_2131	ASV_2290	ASV_6413
ASV_2132	ASV_2291	ASV_6466
ASV_2167	ASV_2351	ASV_6493
ASV_2170	ASV_2354	ASV_6520
ASV_2171	ASV_2355	ASV_6521
ASV_2172	ASV_2356	ASV_6522
ASV_2173	ASV_2358	ASV_6523
ASV_2176	ASV_2359	ASV_6524
ASV_2177	ASV_2360	ASV_6525
ASV_2178	ASV_2361	ASV_6526
ASV_2182	ASV_2362	ASV_6527
ASV_2186	ASV_2363	ASV_6528
ASV_2188	ASV_2364	ASV_6529
ASV_2190	ASV_2365	ASV_6530
ASV_2191	ASV_2367	ASV_6531
ASV_2192	ASV_2368	ASV_6532
ASV_2193	ASV_2372	ASV_6534
ASV_2194	ASV_2373	ASV_6535
ASV_2195	ASV_2443	ASV_6536
ASV_2197	ASV_2448	ASV_6537
ASV_2198	ASV_2449	ASV_6538
ASV_2236	ASV_2450	ASV_6539
ASV_2239	ASV_2451	ASV_6540
ASV_2240	ASV_2452	ASV_6541
ASV_2241	ASV_2453	ASV_6542
ASV_2243	ASV_2454	ASV_6543
ASV_2245	ASV_2455	ASV_6544
ASV_2246	ASV_2456	ASV_6545
ASV_2248	ASV_2457	ASV_6546
ASV_2250	ASV_2458	ASV_6547
ASV_2251	ASV_2459	ASV_6548
ASV_2254	ASV_2460	ASV_6549
ASV_2255	ASV_2463	ASV_6550
ASV_2257	ASV_2464	ASV_6551
ASV_2258	ASV_2466	ASV_6552
ASV_2259	ASV_2521	ASV_6553
ASV_2261	ASV_2523	ASV_6554
ASV_2265	ASV_2524	ASV_6555
ASV_2267	ASV_2528	ASV_6556
ASV_2315	ASV_2529	ASV_6557
ASV_2316	ASV_2532	ASV_6558
ASV_2317	ASV_2533	ASV_6559
ASV_2318	ASV_2534	ASV_6560
ASV_2321	ASV_2535	ASV_6561
ASV_2322	ASV_2536	ASV_6562
ASV_2323	ASV_2537	ASV_6563
ASV_2326	ASV_2538	ASV_6564
ASV_2327	ASV_2539	ASV_6565
ASV_2331	ASV_2540	ASV_6566
ASV_2333	ASV_2541	ASV_6567
ASV_2334	ASV_2543	ASV_6568
ASV_2335	ASV_2545	ASV_6569
ASV_2336	ASV_2546	ASV_6570
ASV_2337	ASV_2547	ASV_6571
ASV_2339	ASV_2548	ASV_6572
ASV_2340	ASV_2611	ASV_6573
ASV_2341	ASV_2612	ASV_6574
ASV_2343	ASV_2613	ASV_6575
ASV_2344	ASV_2616	ASV_6576
ASV_2345	ASV_2617	ASV_6577
ASV_2348	ASV_2618	ASV_6578
ASV_2397	ASV_2620	ASV_6579
ASV_2398	ASV_2621	ASV_6580
ASV_2400	ASV_2622	ASV_6581
ASV_2402	ASV_2623	ASV_8215
ASV_2403	ASV_2624	ASV_8322
ASV_2404	ASV_2625	ASV_8383
ASV_2405	ASV_2626	ASV_8421
ASV_2407	ASV_2627	ASV_8422
ASV_2409	ASV_2631	ASV_8423
ASV_2410	ASV_2632	ASV_8424
ASV_2411	ASV_2633	ASV_8425
ASV_2412	ASV_2634	ASV_8426
ASV_2413	ASV_2635	ASV_8427
ASV_2415	ASV_2636	ASV_8428
ASV_2416	ASV_2638	ASV_8429
ASV_2419	ASV_2639	ASV_8430
ASV_2420	ASV_2641	ASV_8431
ASV_2426	ASV_2720	ASV_8432
ASV_2427	ASV_2721	ASV_8433
ASV_2428	ASV_2723	ASV_8434
ASV_2429	ASV_2725	ASV_8435
ASV_2430	ASV_2726	ASV_8437
ASV_2431	ASV_2727	ASV_8438
ASV_2432	ASV_2729	ASV_8439
ASV_2433	ASV_2732	ASV_8440
ASV_2434	ASV_2733	ASV_8441
ASV_2435	ASV_2734	ASV_8442
ASV_2436	ASV_2735	ASV_8443
ASV_2437	ASV_2736	ASV_8444
ASV_2438	ASV_2738	ASV_8445
ASV_2440	ASV_2739	ASV_8446
ASV_2486	ASV_2740	ASV_8447
ASV_2487	ASV_2741	ASV_8448
ASV_2488	ASV_2742	ASV_8449
ASV_2492	ASV_2743	ASV_8450
ASV_2495	ASV_2744	ASV_8451
ASV_2496	ASV_2745	ASV_8452
ASV_2497	ASV_2746	ASV_8453
ASV_2499	ASV_2747	ASV_8454
ASV_2501	ASV_2748	ASV_8455
ASV_2502	ASV_2749	ASV_8456
ASV_2503	ASV_2750	ASV_8457
ASV_2504	ASV_2751	ASV_8458
ASV_2505	ASV_2752	ASV_8459
ASV_2508	ASV_2753	ASV_8460
ASV_2509	ASV_2755	ASV_8461
ASV_2511	ASV_2756	ASV_8462
ASV_2512	ASV_2757	ASV_8463
ASV_2515	ASV_2759	ASV_8464
ASV_2517	ASV_2760	ASV_8465
ASV_2519	ASV_2761	ASV_8466
ASV_2569	ASV_2763	ASV_8467
ASV_2571	ASV_2764	ASV_8468
ASV_2572	ASV_2853	ASV_8469
ASV_2573	ASV_2854	ASV_8470
ASV_2579	ASV_2855	ASV_8471
ASV_2580	ASV_2856	ASV_8472
ASV_2583	ASV_2857	ASV_8473
ASV_2584	ASV_2858	ASV_8474
ASV_2586	ASV_2859	ASV_8475
ASV_2589	ASV_2860	ASV_8476
ASV_2590	ASV_2861	ASV_8477
ASV_2591	ASV_2862	ASV_8478
ASV_2592	ASV_2863	ASV_8479
ASV_2593	ASV_2864	ASV_8480
ASV_2595	ASV_2865	ASV_8481
ASV_2596	ASV_2866	ASV_8482
ASV_2600	ASV_2867	ASV_8483
ASV_2601	ASV_2868	ASV_8484
ASV_2602	ASV_2869	ASV_8485
ASV_2603	ASV_2870	ASV_8486
ASV_2605	ASV_2871	ASV_8487
ASV_2606	ASV_2872	ASV_8488
ASV_2607	ASV_2873	ASV_8489
ASV_2608	ASV_2874	ASV_8490
ASV_2610	ASV_2875	ASV_8491
ASV_2673	ASV_2876	ASV_8492
ASV_2675	ASV_2877	ASV_8493
ASV_2677	ASV_2878	ASV_8494
ASV_2678	ASV_2879	ASV_8495
ASV_2679	ASV_2880	ASV_8496
ASV_2681	ASV_2882	ASV_8497
ASV_2682	ASV_2883	ASV_8498
ASV_2684	ASV_2884	ASV_8499
ASV_2685	ASV_2885	ASV_8500
ASV_2686	ASV_2886	ASV_8501
ASV_2691	ASV_2888	ASV_8502
ASV_2692	ASV_2889	ASV_8503
ASV_2693	ASV_2890	ASV_8504
ASV_2695	ASV_2891	ASV_8505
ASV_2696	ASV_2973	ASV_8506
ASV_2699	ASV_2974	ASV_8507
ASV_2700	ASV_2975	ASV_8508
ASV_2702	ASV_2978	ASV_8509
ASV_2703	ASV_2979	ASV_8510
ASV_2705	ASV_2980	ASV_8511
ASV_2706	ASV_2981	ASV_8512
ASV_2707	ASV_2983	ASV_8514
ASV_2708	ASV_2984	ASV_8515
ASV_2710	ASV_2985	ASV_8516
ASV_2711	ASV_2986	ASV_8517
ASV_2712	ASV_2987	ASV_8519
ASV_2714	ASV_2988	ASV_8521
ASV_2715	ASV_2989	ASV_8522
ASV_2716	ASV_2990	ASV_8523
ASV_2718	ASV_2991	ASV_8524
ASV_2719	ASV_2993	ASV_8525
ASV_2804	ASV_2994	ASV_8526
ASV_2806	ASV_2995	ASV_8527
ASV_2807	ASV_2996	ASV_8529
ASV_2809	ASV_2997	ASV_8530
ASV_2810	ASV_2998	ASV_8531
ASV_2812	ASV_2999	ASV_8532
ASV_2813	ASV_3000	ASV_8533
ASV_2817	ASV_3001	ASV_8534
ASV_2818	ASV_3002	ASV_8535
ASV_2819	ASV_3003	ASV_8536
ASV_2820	ASV_3004	ASV_8537
ASV_2821	ASV_3006	ASV_8538
ASV_2822	ASV_3007	ASV_8539
ASV_2823	ASV_3008	ASV_8540
ASV_2824	ASV_3009	ASV_8541
ASV_2825	ASV_3011	ASV_8542
ASV_2826	ASV_3012	ASV_8543
ASV_2828	ASV_3121	ASV_8544
ASV_2829	ASV_3122	ASV_8545
ASV_2831	ASV_3124	ASV_8546
ASV_2832	ASV_3132	ASV_8547
ASV_2833	ASV_3135	ASV_8548
ASV_2834	ASV_3136	ASV_8549
ASV_2835	ASV_3138	ASV_8550
ASV_2836	ASV_3139	ASV_8551
ASV_2838	ASV_3140	ASV_8552
ASV_2839	ASV_3141	ASV_8553
ASV_2841	ASV_3142	ASV_8554
ASV_2843	ASV_3143	ASV_8555
ASV_2846	ASV_3144	ASV_8556
ASV_2847	ASV_3145	ASV_8557
ASV_2850	ASV_3146	ASV_8558
ASV_2923	ASV_3147	ASV_8559
ASV_2925	ASV_3148	ASV_8560
ASV_2928	ASV_3149	ASV_8561
ASV_2929	ASV_3151	ASV_8562
ASV_2930	ASV_3152	ASV_8563
ASV_2933	ASV_3153	ASV_8564
ASV_2934	ASV_3154	ASV_8565
ASV_2935	ASV_3155	ASV_8566
ASV_2936	ASV_3157	ASV_8567
ASV_2937	ASV_3158	ASV_8568
ASV_2939	ASV_3159	ASV_8569
ASV_2940	ASV_3161	ASV_8570
ASV_2941	ASV_3162	ASV_8571
ASV_2942	ASV_3163	ASV_8572
ASV_2944	ASV_3164	ASV_8573
ASV_2946	ASV_3165	ASV_8574
ASV_2947	ASV_3166	ASV_8575
ASV_2948	ASV_3167	ASV_8576
ASV_2949	ASV_3168	ASV_8577
ASV_2950	ASV_3169	ASV_8578
ASV_2951	ASV_3171	ASV_8579
ASV_2953	ASV_3172	ASV_8580
ASV_2954	ASV_3173	ASV_8581
ASV_2955	ASV_3174	ASV_8582
ASV_2957	ASV_3175	ASV_8583
ASV_2958	ASV_3176	ASV_8584
ASV_2959	ASV_3178	ASV_8585
ASV_2960	ASV_3319	ASV_8586
ASV_2961	ASV_3321	ASV_8587
ASV_2962	ASV_3322	ASV_8588
ASV_2964	ASV_3323	ASV_8589
ASV_2968	ASV_3324	ASV_8590
ASV_3053	ASV_3325	ASV_8591
ASV_3054	ASV_3328	ASV_8592
ASV_3057	ASV_3329	ASV_8593
ASV_3059	ASV_3333	ASV_8594
ASV_3061	ASV_3334	ASV_8595
ASV_3063	ASV_3336	ASV_8596
ASV_3064	ASV_3337	ASV_11034
ASV_3065	ASV_3338	ASV_12040
ASV_3069	ASV_3339	ASV_12319
ASV_3070	ASV_3340	ASV_12330
ASV_3071	ASV_3341	ASV_12374
ASV_3072	ASV_3343	ASV_12593
ASV_3074	ASV_3344	ASV_12636
ASV_3075	ASV_3345	ASV_12787
ASV_3076	ASV_3346	ASV_12810
ASV_3077	ASV_3347	ASV_12811
ASV_3079	ASV_3348	ASV_12812
ASV_3080	ASV_3349	ASV_12813
ASV_3081	ASV_3350	ASV_12814
ASV_3083	ASV_3351	ASV_12815
ASV_3085	ASV_3352	ASV_12816
ASV_3086	ASV_3353	ASV_12817
ASV_3087	ASV_3354	ASV_12818
ASV_3088	ASV_3355	ASV_12819
ASV_3089	ASV_3356	ASV_12820
ASV_3090	ASV_3357	ASV_12821
ASV_3091	ASV_3358	ASV_12822
ASV_3094	ASV_3359	ASV_12823
ASV_3095	ASV_3360	ASV_12824
ASV_3096	ASV_3363	ASV_12825
ASV_3097	ASV_3364	ASV_12826
ASV_3099	ASV_3365	ASV_12827
ASV_3100	ASV_3366	ASV_12828
ASV_3102	ASV_3367	ASV_12829
ASV_3103	ASV_3368	ASV_12830
ASV_3104	ASV_3369	ASV_12832
ASV_3105	ASV_3370	ASV_12833
ASV_3106	ASV_3371	ASV_12834
ASV_3107	ASV_3372	ASV_12835
ASV_3108	ASV_3373	ASV_12836
ASV_3109	ASV_3374	ASV_12837
ASV_3112	ASV_3375	ASV_12838
ASV_3114	ASV_3376	ASV_12839
ASV_3115	ASV_3377	ASV_12840
ASV_3116	ASV_3378	ASV_12841
ASV_3120	ASV_3380	ASV_12842
ASV_3236	ASV_3381	ASV_12843
ASV_3237	ASV_3382	ASV_12844
ASV_3238	ASV_3383	ASV_12845
ASV_3239	ASV_3384	ASV_12846
ASV_3240	ASV_3385	ASV_12847
ASV_3241	ASV_3386	ASV_12848
ASV_3242	ASV_3387	ASV_12849
ASV_3243	ASV_3388	ASV_12850
ASV_3246	ASV_3389	ASV_12851
ASV_3247	ASV_3390	ASV_12852
ASV_3249	ASV_3392	ASV_12853
ASV_3250	ASV_3393	ASV_12854
ASV_3251	ASV_3553	ASV_12855
ASV_3252	ASV_3554	ASV_12856
ASV_3253	ASV_3555	ASV_12857
ASV_3254	ASV_3557	ASV_12858
ASV_3255	ASV_3560	ASV_12859
ASV_3256	ASV_3561	ASV_12860
ASV_3257	ASV_3562	ASV_12861
ASV_3258	ASV_3563	ASV_12862
ASV_3259	ASV_3565	ASV_12863
ASV_3261	ASV_3566	ASV_12864
ASV_3262	ASV_3567	ASV_12865
ASV_3263	ASV_3568	ASV_12866
ASV_3264	ASV_3569	ASV_12867
ASV_3265	ASV_3570	ASV_12868
ASV_3266	ASV_3571	ASV_12869
ASV_3267	ASV_3572	ASV_12870
ASV_3268	ASV_3573	ASV_12871
ASV_3269	ASV_3574	ASV_12872
ASV_3270	ASV_3576	ASV_12873
ASV_3273	ASV_3577	ASV_12874
ASV_3274	ASV_3578	ASV_12875
ASV_3275	ASV_3579	ASV_12876
ASV_3276	ASV_3580	ASV_12877
ASV_3277	ASV_3582	ASV_12878
ASV_3278	ASV_3583	ASV_12879
ASV_3279	ASV_3584	ASV_12880
ASV_3280	ASV_3586	ASV_12881
ASV_3281	ASV_3587	ASV_12882
ASV_3282	ASV_3588	ASV_12883
ASV_3283	ASV_3590	ASV_12884
ASV_3284	ASV_3592	ASV_12885
ASV_3285	ASV_3593	ASV_12886
ASV_3288	ASV_3594	ASV_12887
ASV_3289	ASV_3595	ASV_12888
ASV_3291	ASV_3596	ASV_12889
ASV_3292	ASV_3597	ASV_12890
ASV_3293	ASV_3598	ASV_12891
ASV_3297	ASV_3599	ASV_12892
ASV_3298	ASV_3600	ASV_12893
ASV_3300	ASV_3601	ASV_12894
ASV_3301	ASV_3602	ASV_12895
ASV_3302	ASV_3604	ASV_12896
ASV_3303	ASV_3605	ASV_12897
ASV_3304	ASV_3606	ASV_12898
ASV_3305	ASV_3607	ASV_12899
ASV_3306	ASV_3608	ASV_12900
ASV_3308	ASV_3609	ASV_12901
ASV_3309	ASV_3610	ASV_12902
ASV_3311	ASV_3611	ASV_12903
ASV_3312	ASV_3612	ASV_12904
ASV_3314	ASV_3613	ASV_12905
ASV_3315	ASV_3614	ASV_12906
ASV_3316	ASV_3616	ASV_12907
ASV_3317	ASV_3617	ASV_12908
ASV_3318	ASV_3618	ASV_12909
ASV_3444	ASV_3619	ASV_12910
ASV_3445	ASV_3620	ASV_12911
ASV_3446	ASV_3621	ASV_12912
ASV_3447	ASV_3622	ASV_12913
ASV_3448	ASV_3623	ASV_12914
ASV_3449	ASV_3824	ASV_12915
ASV_3450	ASV_3825	ASV_12916
ASV_3453	ASV_3826	ASV_12917
ASV_3454	ASV_3829	ASV_12918
ASV_3455	ASV_3831	ASV_12919
ASV_3456	ASV_3835	ASV_12920
ASV_3457	ASV_3836	ASV_12921
ASV_3459	ASV_3839	ASV_12922
ASV_3460	ASV_12947	ASV_12923
ASV_3461	ASV_12948	ASV_12924
ASV_3463	ASV_12949	ASV_12925
ASV_3464	ASV_12950	ASV_12926
ASV_3465	ASV_12951	ASV_12927
ASV_3466	ASV_12952	ASV_12928
ASV_3468	ASV_12953	ASV_12929
ASV_3469	ASV_12955	ASV_12930
ASV_3472	ASV_12956	ASV_12931
ASV_3473	ASV_12957	ASV_12932
ASV_3474	ASV_12958	ASV_12933
ASV_3475	ASV_12959	ASV_12934
ASV_3477	ASV_12960	ASV_12935
ASV_3478	ASV_12961	ASV_12936
ASV_3481	ASV_12962	ASV_12937
ASV_3482	ASV_12963	ASV_12938
ASV_3483	ASV_12964	ASV_12939
ASV_3484	ASV_12965	ASV_12940
ASV_3485	ASV_12966	ASV_12941
ASV_3486	ASV_12967	ASV_12942
ASV_3487	ASV_12968	ASV_12943
ASV_3488	ASV_12969	ASV_12944
ASV_3489	ASV_12970	ASV_12945
ASV_3493	ASV_12971	ASV_12946
ASV_3494	ASV_12972	ASV_12947
ASV_3495	ASV_12973	ASV_12948
ASV_3496	ASV_12974	ASV_12949
ASV_3497	ASV_12975	ASV_12950
ASV_3498	ASV_12976	ASV_12951
ASV_3499	ASV_12977	ASV_12952
ASV_3500	ASV_12978	ASV_12953
ASV_3501	ASV_12979	ASV_12955
ASV_3502	ASV_12980	ASV_12956
ASV_3503	ASV_12981	ASV_12957
ASV_3505	ASV_12982	ASV_12958
ASV_3506	ASV_12983	ASV_12959
ASV_3508	ASV_12984	ASV_12960
ASV_3510	ASV_12985	ASV_12961
ASV_3511	ASV_12986	ASV_12962
ASV_3512	ASV_12987	ASV_12963
ASV_3513	ASV_12988	ASV_12964
ASV_3514	ASV_12989	ASV_12965
ASV_3515	ASV_12990	ASV_12966
ASV_4476	ASV_12991	ASV_12967
ASV_4477	ASV_12992	ASV_12968
ASV_4478	ASV_12993	ASV_12969
ASV_4479	ASV_12994	ASV_12970
ASV_4480	ASV_12995	ASV_12971
ASV_4481	ASV_12996	ASV_12972
ASV_4482	ASV_12997	ASV_12973
ASV_4483	ASV_12998	ASV_12974
ASV_4484	ASV_12999	ASV_12975
ASV_4485	ASV_13000	ASV_12976
ASV_4486	ASV_13001	ASV_12977
ASV_4490	ASV_13002	ASV_12978
ASV_4491	ASV_13003	ASV_12979
ASV_4492	ASV_13004	ASV_12980
ASV_4493	ASV_13005	ASV_12981
ASV_4494	ASV_13006	ASV_12982
ASV_4496	ASV_13007	ASV_12983
ASV_4497	ASV_13008	ASV_12984
ASV_4498	ASV_13009	ASV_12985
ASV_4499	ASV_13011	ASV_12986
ASV_4500	ASV_13012	ASV_12987
ASV_4501	ASV_13015	ASV_12988
ASV_4502	ASV_13016	ASV_12989
ASV_4503	ASV_13017	ASV_12990
ASV_4504	ASV_13019	ASV_12991
ASV_4505	ASV_13020	ASV_12992
ASV_4506	ASV_13021	ASV_12993
ASV_4507	ASV_13022	ASV_12994
ASV_4508	ASV_13023	ASV_12995
ASV_4509	ASV_13024	ASV_12996
ASV_4510	ASV_13025	ASV_12997
ASV_4511	ASV_13026	ASV_12998
ASV_4513	ASV_13027	ASV_12999
ASV_4514	ASV_13028	ASV_13000
ASV_4515	ASV_13029	ASV_13001
ASV_4516	ASV_13030	ASV_13002
ASV_4517	ASV_13031	ASV_13003
ASV_4518	ASV_13032	ASV_13004
ASV_4519	ASV_13033	ASV_13005
ASV_4520	ASV_13034	ASV_13006
ASV_4521	ASV_262	ASV_13007
ASV_4522	ASV_801	ASV_13008
ASV_4524	ASV_831	ASV_13009
ASV_4525	ASV_858	ASV_13011
ASV_4527	ASV_980	ASV_13012
ASV_4528	ASV_981	ASV_13015
ASV_4529	ASV_1003	ASV_13016
ASV_4531	ASV_1046	ASV_13017
ASV_4532	ASV_1107	ASV_13019
ASV_4533	ASV_1163	ASV_13020
ASV_4534	ASV_1226	ASV_13021
ASV_4535	ASV_1249	ASV_13022
ASV_4536	ASV_1259	ASV_13023
ASV_4537	ASV_1289	ASV_13024
ASV_4538	ASV_1310	ASV_13025
ASV_4540	ASV_1356	ASV_13026
ASV_4542	ASV_1370	ASV_13027
ASV_4543	ASV_1391	ASV_13028
ASV_4544	ASV_1419	ASV_13029
ASV_4545	ASV_1437	ASV_13030
ASV_4546	ASV_1459	ASV_13031
ASV_4547	ASV_1460	ASV_13032
ASV_4548	ASV_1492	ASV_13033
ASV_4549	ASV_1508	ASV_13034
ASV_4550	ASV_1509	ASV_13035
ASV_4551	ASV_1535	ASV_13036
ASV_4553	ASV_1556	ASV_13037
ASV_4554	ASV_1578	ASV_13038
ASV_4557	ASV_1604	ASV_13039
ASV_4558	ASV_1660	ASV_13041
ASV_4559	ASV_1661	ASV_13042
ASV_4560	ASV_1772	ASV_13043
ASV_4561	ASV_1818	ASV_13045
ASV_4562	ASV_1819	ASV_13047
ASV_4563	ASV_1820	ASV_13048
ASV_4564	ASV_1821	ASV_13049
ASV_4565	ASV_1822	ASV_13050
ASV_4918	ASV_1897	ASV_13051
ASV_4919	ASV_1928	ASV_13052
ASV_4920	ASV_1929	ASV_13053
ASV_4921	ASV_1989	ASV_13054
ASV_4922	ASV_1990	ASV_13055
ASV_4923	ASV_2038	ASV_13056
ASV_4924	ASV_2039	ASV_4500
ASV_4925	ASV_2091	ASV_4501
ASV_4926	ASV_2092	ASV_4502
ASV_4927	ASV_2158	ASV_4503
ASV_4928	ASV_2220	ASV_4504
ASV_4929	ASV_2223	ASV_4505
ASV_4930	ASV_2224	ASV_4506
ASV_4931	ASV_2225	ASV_4507
ASV_4932	ASV_2293	ASV_4508
ASV_4933	ASV_2295	ASV_4509
ASV_4935	ASV_2296	ASV_4510
ASV_4936	ASV_2297	ASV_4511
ASV_4937	ASV_2374	ASV_4513
ASV_4939	ASV_2376	ASV_4514
ASV_4941	ASV_2378	ASV_4515
ASV_4942	ASV_2380	ASV_4516
ASV_4946	ASV_2469	ASV_4517
ASV_4947	ASV_2470	ASV_4518
ASV_4948	ASV_2474	ASV_4519
ASV_4949	ASV_2550	ASV_4520
ASV_4950	ASV_2553	ASV_4521
ASV_4951	ASV_2645	ASV_4522
ASV_4952	ASV_2649	ASV_4524
ASV_4954	ASV_2650	ASV_4525
ASV_4955	ASV_2652	ASV_4527
ASV_4956	ASV_2653	ASV_4528
ASV_4957	ASV_2654	ASV_4529
ASV_4958	ASV_2758	ASV_4531
ASV_4959	ASV_2765	ASV_4532
ASV_4960	ASV_2766	ASV_4533
ASV_4961	ASV_2767	ASV_4534
ASV_4962	ASV_2768	ASV_4535
ASV_4963	ASV_2770	ASV_4536
ASV_4964	ASV_2773	ASV_4537
ASV_4965	ASV_2774	ASV_4538
ASV_4966	ASV_2775	ASV_4540
ASV_4967	ASV_2776	ASV_4542
ASV_4968	ASV_2777	ASV_4543
ASV_4969	ASV_2778	ASV_4544
ASV_4971	ASV_2892	ASV_4545
ASV_4972	ASV_2893	ASV_4546
ASV_4974	ASV_2894	ASV_4547
ASV_4976	ASV_2896	ASV_4548
ASV_4977	ASV_2897	ASV_4549
ASV_4978	ASV_3014	ASV_4550
ASV_4979	ASV_3017	ASV_4551
ASV_4981	ASV_3019	ASV_4553
ASV_4982	ASV_3021	ASV_4554
ASV_4983	ASV_3022	ASV_4557
ASV_4984	ASV_3023	ASV_4558
ASV_4985	ASV_3024	ASV_4559
ASV_4986	ASV_3182	ASV_4560
ASV_4988	ASV_3183	ASV_4561
ASV_4989	ASV_3184	ASV_4562
ASV_4990	ASV_3185	ASV_4563
ASV_4991	ASV_3186	ASV_4564
ASV_4993	ASV_3187	ASV_4565
ASV_4994	ASV_3188	ASV_4918
ASV_4995	ASV_3189	ASV_4919
ASV_4996	ASV_3192	ASV_4920
ASV_4997	ASV_3193	ASV_4921
ASV_4998	ASV_3194	ASV_4922
ASV_4999	ASV_3196	ASV_4923
ASV_5000	ASV_3396	ASV_4924
ASV_5001	ASV_3397	ASV_4925
ASV_5002	ASV_3400	ASV_4926
ASV_5003	ASV_3401	ASV_4927
ASV_5004	ASV_3402	ASV_4928
ASV_5005	ASV_3403	ASV_4929
ASV_5006	ASV_3404	ASV_4930
ASV_5007	ASV_3405	ASV_4931
ASV_5009	ASV_3407	ASV_4932
ASV_5010	ASV_3624	ASV_4933
ASV_5013	ASV_3628	ASV_4935
ASV_5014	ASV_3630	ASV_4936
ASV_5015	ASV_3632	ASV_4937
ASV_5018	ASV_3633	ASV_4939
ASV_5019	ASV_3638	ASV_4941
ASV_5020	ASV_3639	ASV_4942
ASV_5022	ASV_3640	ASV_4946
ASV_5023	ASV_3641	ASV_4947
ASV_5024	ASV_3915	ASV_4948
ASV_5025	ASV_3916	ASV_4949
ASV_5026	ASV_3917	ASV_4950
ASV_5027	ASV_3918	ASV_4951
ASV_5028	ASV_3919	ASV_4952
ASV_5029	ASV_3920	ASV_4954
ASV_5030	ASV_3921	ASV_4955
ASV_5031	ASV_3922	ASV_4956
ASV_5032	ASV_3924	ASV_4957
ASV_5033	ASV_3925	ASV_4958
ASV_5034	ASV_3926	ASV_4959
ASV_5035	ASV_3929	ASV_4960
ASV_5037	ASV_3930	ASV_4961
ASV_5038	ASV_3931	ASV_4962
ASV_5039	ASV_3932	ASV_4963
ASV_5040	ASV_3933	ASV_4964
ASV_5043	ASV_3934	ASV_4965
ASV_5044	ASV_3936	ASV_4966
ASV_5045	ASV_3937	ASV_4967
ASV_5046	ASV_4224	ASV_4968
ASV_5047	ASV_4257	ASV_4969
ASV_5049	ASV_4258	ASV_4971
ASV_5050	ASV_4259	ASV_4972
ASV_5051	ASV_4260	ASV_4974
ASV_5052	ASV_4261	ASV_4976
ASV_5053	ASV_4262	ASV_3561
ASV_5057	ASV_4266	ASV_3562
ASV_5058	ASV_4267	ASV_3563
ASV_5059	ASV_4269	ASV_3565
ASV_5060	ASV_4270	ASV_3566
ASV_5061	ASV_4271	ASV_3567
ASV_5062	ASV_4272	ASV_3568
ASV_5063	ASV_4273	ASV_3569
ASV_5064	ASV_4274	ASV_3570
ASV_5067	ASV_4277	ASV_3571
ASV_5068	ASV_4278	ASV_3572
ASV_5069	ASV_4279	ASV_3573
ASV_5070	ASV_4281	ASV_3574
ASV_5071	ASV_4282	ASV_3576
ASV_5072	ASV_4283	ASV_3577
ASV_5073	ASV_4284	ASV_3578
ASV_5074	ASV_4285	ASV_3579
ASV_5075	ASV_4286	ASV_3580
ASV_5076	ASV_4288	ASV_3582
ASV_5077	ASV_4725	ASV_3583
ASV_5078	ASV_4727	ASV_3584
ASV_5080	ASV_4731	ASV_3586
ASV_5081	ASV_4733	ASV_3587
ASV_5082	ASV_4734	ASV_3588
ASV_5083	ASV_4735	ASV_3590
ASV_5084	ASV_4736	ASV_3592
ASV_5086	ASV_4737	ASV_3593
ASV_5087	ASV_4742	ASV_3594
ASV_5088	ASV_4744	ASV_3595
ASV_5089	ASV_4745	ASV_3596
ASV_5090	ASV_4746	ASV_3597
ASV_5092	ASV_4747	ASV_3598
ASV_5093	ASV_4748	ASV_3599
ASV_5094	ASV_4752	ASV_3600
ASV_5096	ASV_4753	ASV_3601
ASV_5097	ASV_4755	ASV_3602
ASV_5098	ASV_4756	ASV_3604
ASV_5099	ASV_4757	ASV_3605
ASV_5101	ASV_4760	ASV_3606
ASV_5102	ASV_4761	ASV_3607
ASV_5103	ASV_4762	ASV_3608
ASV_5104	ASV_4763	ASV_3609
ASV_5105	ASV_4764	ASV_3610
ASV_5106	ASV_4765	ASV_3611
ASV_5107	ASV_4766	ASV_3612
ASV_5108	ASV_4767	ASV_3613
ASV_5109	ASV_4769	ASV_3614
ASV_5110	ASV_4770	ASV_3616
ASV_5112	ASV_4771	ASV_3617
ASV_5113	ASV_4772	ASV_3618
ASV_5114	ASV_4773	ASV_3619
ASV_5115	ASV_4774	ASV_3620
ASV_5116	ASV_4775	ASV_3621
ASV_5117	ASV_4776	ASV_3622
ASV_5118	ASV_4778	ASV_3623
ASV_5120	ASV_4779	ASV_3824
ASV_5121	ASV_5392	ASV_3825
ASV_5122	ASV_5393	ASV_3826
ASV_5123	ASV_5394	ASV_3829
ASV_5124	ASV_5395	ASV_3831
ASV_5125	ASV_5396	ASV_3835
ASV_5126	ASV_5397	ASV_3836
ASV_5128	ASV_5398	ASV_3839
ASV_5129	ASV_5399	ASV_12947
ASV_5130	ASV_5400	ASV_12948
ASV_5132	ASV_5401	ASV_12949
ASV_5133	ASV_5402	ASV_12950
ASV_5135	ASV_5404	ASV_12951
ASV_5137	ASV_5406	ASV_12952
ASV_5138	ASV_5407	ASV_12953
ASV_5139	ASV_5408	ASV_12955
ASV_5140	ASV_5409	ASV_12956
ASV_5141	ASV_5410	ASV_12957
ASV_5142	ASV_5411	ASV_12958
ASV_5143	ASV_5412	ASV_12959
ASV_5144	ASV_5413	ASV_12960
ASV_5145	ASV_5415	ASV_12961
ASV_5146	ASV_5416	ASV_12962
ASV_5147	ASV_5417	ASV_12963
ASV_5148	ASV_5418	ASV_12964
ASV_5149	ASV_5419	ASV_12965
ASV_5150	ASV_5420	ASV_12966
ASV_5151	ASV_5421	ASV_12967
ASV_5152	ASV_5422	ASV_12968
ASV_5153	ASV_5423	ASV_12969
ASV_5155	ASV_5424	ASV_12970
ASV_5156	ASV_5425	ASV_12971
ASV_5157	ASV_5426	ASV_12972
ASV_5158	ASV_5427	ASV_12973
ASV_5159	ASV_5428	ASV_12974
ASV_5160	ASV_5429	ASV_12975
ASV_5162	ASV_5430	ASV_12976
ASV_5164	ASV_5432	ASV_12977
ASV_5165	ASV_5433	ASV_12978
ASV_5166	ASV_5434	ASV_12979
ASV_5169	ASV_5435	ASV_12980
ASV_5170	ASV_5436	ASV_12981
ASV_5171	ASV_5437	ASV_12982
ASV_5172	ASV_5438	ASV_12983
ASV_5173	ASV_5440	ASV_12984
ASV_5592	ASV_5441	ASV_12985
ASV_5593	ASV_5442	ASV_12986
ASV_5594	ASV_5443	ASV_12987
ASV_5595	ASV_5444	ASV_12988
ASV_5596	ASV_6360	ASV_12989
ASV_5597	ASV_6361	ASV_12990
ASV_5598	ASV_6362	ASV_12991
ASV_5599	ASV_6363	ASV_320
ASV_5600	ASV_6364	ASV_324
ASV_5601	ASV_6365	ASV_456
ASV_5602	ASV_6366	ASV_496
ASV_5603	ASV_6367	ASV_545
ASV_5604	ASV_6368	ASV_560
ASV_5605	ASV_6369	ASV_663
ASV_5606	ASV_6370	ASV_668
ASV_5607	ASV_6371	ASV_682
ASV_5608	ASV_6372	ASV_698
ASV_5609	ASV_6373	ASV_703
ASV_5610	ASV_6374	ASV_704
ASV_5611	ASV_6378	ASV_719
ASV_5612	ASV_6379	ASV_723
ASV_5613	ASV_6380	ASV_725
ASV_5614	ASV_6381	ASV_726
ASV_5615	ASV_6382	ASV_743
ASV_5616	ASV_6384	ASV_744
ASV_5618	ASV_6385	ASV_748
ASV_5619		ASV_767
ASV_5620		ASV_799
ASV_5621		ASV_842
ASV_5622		ASV_843
ASV_5623		ASV_844
ASV_5624		ASV_849
ASV_5625		ASV_857
ASV_5626		ASV_866
ASV_5627		ASV_879
ASV_5628		ASV_880
ASV_5629		ASV_897
ASV_5630		ASV_909
ASV_5631		ASV_916
ASV_5632		ASV_917
ASV_5633		ASV_918
ASV_5635		ASV_926
ASV_5636		ASV_927
ASV_5637		ASV_928
ASV_5638		ASV_933
ASV_5639		ASV_960
ASV_5640		ASV_961
ASV_5641		ASV_963
ASV_5642		ASV_968
ASV_5643		ASV_969
ASV_5644		ASV_978
ASV_5646		ASV_979
ASV_5647		ASV_989
ASV_5650		ASV_990
ASV_5651		ASV_991
ASV_5652		ASV_1012
ASV_5653		ASV_1015
ASV_5654		ASV_1035
ASV_5655		ASV_1045
ASV_5656		ASV_1060
ASV_5657		ASV_1069
ASV_5658		ASV_1070
ASV_5659		ASV_1080
ASV_5660		ASV_1081
ASV_5661		ASV_1083
ASV_5662		ASV_1084
ASV_5663		ASV_1093
ASV_5664		ASV_1094
ASV_5665		ASV_1095
ASV_5666		ASV_1096
ASV_5667		ASV_1105
ASV_5668		ASV_1125
ASV_5669		ASV_1144
ASV_5670		ASV_1159
ASV_5671		ASV_1161
ASV_5672		ASV_1170
ASV_5674		ASV_1171
ASV_5675		ASV_1172
ASV_5676		ASV_1188
ASV_5677		ASV_1205
ASV_5678		ASV_1219
ASV_5680		ASV_1223
ASV_5681		ASV_1225
ASV_5682		ASV_1244
ASV_5683		ASV_1245
ASV_5684		ASV_1246
ASV_5685		ASV_1247
ASV_5686		ASV_1248
ASV_5687		ASV_1258
ASV_5688		ASV_1271
ASV_5689		ASV_1274
ASV_5690		ASV_1283
ASV_5691		ASV_1284
ASV_5693		ASV_1285
ASV_5694		ASV_1287
ASV_5695		ASV_1304
ASV_5697		ASV_1305
ASV_5699		ASV_1306
ASV_5701		ASV_1307
ASV_5702		ASV_1308
ASV_5703		ASV_1326
ASV_5704		ASV_1328
ASV_5705		ASV_1330
ASV_5706		ASV_1331
ASV_5707		ASV_1332
ASV_5708		ASV_1333
ASV_5710		ASV_1352
ASV_5711		ASV_1383
ASV_5713		ASV_1384
ASV_5714		ASV_1385
ASV_5715		ASV_1386
ASV_5716		ASV_1387
ASV_5717		ASV_1388
ASV_5718		ASV_1389
ASV_5719		ASV_1413
ASV_5720		ASV_1414
ASV_5721		ASV_1415
ASV_5722		ASV_1417
ASV_5723		ASV_1418
ASV_5724		ASV_1432
ASV_5725		ASV_1436
ASV_5726		ASV_1456
ASV_5728		ASV_1458
ASV_5729		ASV_1486
ASV_5730		ASV_1488
ASV_5732		ASV_1489
ASV_5733		ASV_1503
ASV_5734		ASV_1507
ASV_5735		ASV_1532
ASV_5736		ASV_1551
ASV_5737		ASV_1552
ASV_5738		ASV_1853
ASV_5739		ASV_1854
ASV_5740		ASV_1883
ASV_5741		ASV_1884
ASV_5742		ASV_1885
ASV_5743		ASV_1889
ASV_5744		ASV_1890
ASV_5745		ASV_1892
ASV_5746		ASV_1920
ASV_5747		ASV_1921
ASV_5748		ASV_1923
ASV_5749		ASV_1924
ASV_5750		ASV_1925
ASV_5751		ASV_1926
ASV_5752		ASV_1927
ASV_5753		ASV_1968
ASV_5754		ASV_1970
ASV_5755		ASV_1971
ASV_5756		ASV_1972
ASV_5757		ASV_1973
ASV_5758		ASV_1974
ASV_5759		ASV_1975
ASV_5760		ASV_1976
ASV_5761		ASV_1977
ASV_5762		ASV_1980
ASV_5763		ASV_1981
ASV_5764		ASV_1983
ASV_5765		ASV_2019
ASV_5766		ASV_2022
ASV_5767		ASV_2023
ASV_5768		ASV_2024
ASV_5769		ASV_2025
ASV_5770		ASV_2026
ASV_5771		ASV_2027
ASV_5772		ASV_2029
ASV_5773		ASV_2031
ASV_5774		ASV_2032
ASV_5775		ASV_2033
ASV_5776		ASV_2034
ASV_5777		ASV_2035
ASV_5778		ASV_2073
ASV_5779		ASV_2074
ASV_5780		ASV_2076
ASV_5781		ASV_2078
ASV_5782		ASV_2079
ASV_5783		ASV_2080
ASV_5784		ASV_2082
ASV_5785		ASV_2083
ASV_5786		ASV_2086
ASV_5787		ASV_2087
ASV_5788		ASV_2138
ASV_5789		ASV_2140
ASV_5791		ASV_2141
ASV_5792		ASV_2142
ASV_5793		ASV_2144
ASV_5794		ASV_2145
ASV_5795		ASV_2146
ASV_5796		ASV_2147
ASV_5797		ASV_2148
ASV_5798		ASV_2149
ASV_5799		ASV_2151
ASV_5800		ASV_2152
ASV_5801		ASV_2153
ASV_5802		ASV_2154
ASV_5803		ASV_2155
ASV_5804		ASV_2156
ASV_5805		ASV_2200
ASV_5807		ASV_2201
ASV_5808		ASV_2202
ASV_5809		ASV_2203
ASV_5810		ASV_2204
ASV_5812		ASV_2205
ASV_5813		ASV_2206
ASV_5815		ASV_2208
ASV_5816		ASV_2209
ASV_5817		ASV_2210
ASV_5818		ASV_2211
ASV_5819		ASV_2212
ASV_5822		ASV_2213
ASV_5823		ASV_2214
ASV_5824		ASV_2215
ASV_5825		ASV_2216
ASV_5826		ASV_2217
ASV_5827		ASV_2218
ASV_5828		ASV_2219
ASV_5829		ASV_2270
ASV_5830		ASV_2271
ASV_5831		ASV_2276
ASV_5832		ASV_2277
ASV_5833		ASV_2278
ASV_5834		ASV_2279
ASV_5835		ASV_2280
ASV_5836		ASV_2282
ASV_5837		ASV_2283
ASV_5838		ASV_2284
ASV_5839		ASV_2286
ASV_5840		ASV_2287
ASV_5842		ASV_2289
ASV_5843		ASV_2290
ASV_5844		ASV_2291
ASV_5847		ASV_2351
ASV_5849		ASV_2354
ASV_5850		ASV_2355
ASV_5851		ASV_2356
ASV_5852		ASV_2358
ASV_5853		ASV_2359
ASV_5854		ASV_2360
ASV_5855		ASV_2361
ASV_5858		ASV_2362
ASV_5859		ASV_2363
ASV_5860		ASV_2364
ASV_5861		ASV_2365
ASV_5862		ASV_2367
ASV_5864		ASV_2368
ASV_5865		ASV_2372
ASV_5866		ASV_2373
ASV_5867		ASV_2443
ASV_5868		ASV_2448
ASV_5869		ASV_2449
ASV_5870		ASV_2450
ASV_5871		ASV_2451
ASV_5873		ASV_790
ASV_5874		ASV_1004
ASV_5875		ASV_1047
ASV_5877		ASV_1098
ASV_5879		ASV_1099
ASV_5880		ASV_1109
ASV_5882		ASV_1110
ASV_5883		ASV_1146
ASV_5884		ASV_1147
ASV_5885		ASV_1208
ASV_5886		ASV_1209
ASV_5887		ASV_1227
ASV_5888		ASV_1260
ASV_5889		ASV_1290
ASV_5890		ASV_1357
ASV_5891		ASV_1392
ASV_5892		ASV_1606
ASV_5893		ASV_1689
ASV_5894		ASV_1690
ASV_5895		ASV_1734
ASV_5896		ASV_1735
ASV_5897		ASV_1736
ASV_5898		ASV_1775
ASV_5899		ASV_1776
ASV_5900		ASV_1860
ASV_5901		ASV_1899
ASV_5902		ASV_1900
ASV_5903		ASV_1902
ASV_5904		ASV_1931
ASV_5905		ASV_1991
ASV_5906		ASV_2041
ASV_5907		ASV_2094
ASV_5908		ASV_2095
ASV_5909		ASV_2096
ASV_5910		ASV_2159
ASV_5911		ASV_2161
ASV_5912		ASV_2162
ASV_5913		ASV_2163
ASV_5914		ASV_2227
ASV_5915		ASV_2299
ASV_5916		ASV_2301
ASV_5917		ASV_2303
ASV_5918		ASV_2304
ASV_5919		ASV_2305
ASV_5920		ASV_2381
ASV_5921		ASV_2383
ASV_5922		ASV_2476
ASV_5923		ASV_2554
ASV_5926		ASV_2555
ASV_5927		ASV_2556
ASV_5928		ASV_2558
ASV_5929		ASV_2560
ASV_5930		ASV_2655
ASV_5931		ASV_2656
ASV_5932		ASV_2658
ASV_5933		ASV_2660
ASV_5934		ASV_2661
ASV_5935		ASV_2779
ASV_5936		ASV_2781
ASV_5937		ASV_2782
ASV_5938		ASV_2783
ASV_5939		ASV_2784
ASV_5940		ASV_2900
ASV_5941		ASV_2901
ASV_5942		ASV_2902
ASV_5943		ASV_2903
ASV_5944		ASV_2904
ASV_5945		ASV_2906
ASV_5946		ASV_2908
ASV_5947		ASV_3027
ASV_5948		ASV_3028
ASV_5949		ASV_3029
ASV_5950		ASV_3030
ASV_5952		ASV_3031
ASV_5953		ASV_3032
ASV_5954		ASV_3197
ASV_5955		ASV_3198
ASV_5956		ASV_3200
ASV_5958		ASV_3202
ASV_5961		ASV_3204
ASV_5962		ASV_3205
ASV_5963		ASV_3206
ASV_5964		ASV_3207
ASV_5965		ASV_3209
ASV_5966		ASV_3210
ASV_5967		ASV_3408
ASV_5968		ASV_3409
ASV_5970		ASV_3410
ASV_5971		ASV_3411
ASV_5972		ASV_3413
ASV_5974		ASV_3414
ASV_5975		ASV_3415
ASV_5977		ASV_3416
ASV_5978		ASV_3642
ASV_5979		ASV_3643
ASV_5980		ASV_3644
ASV_5982		ASV_3646
ASV_5983		ASV_3648
ASV_5984		ASV_3649
ASV_5986		ASV_3650
ASV_5987		ASV_3652
ASV_5988		ASV_3655
ASV_5989		ASV_3656
ASV_5990		ASV_3657
ASV_5991		ASV_3658
ASV_5992		ASV_3660
ASV_5993		ASV_3661
ASV_5994		ASV_3662
ASV_5995		ASV_3663
ASV_5996		ASV_3664
ASV_5997		ASV_3665
ASV_5998		ASV_3666
ASV_5999		ASV_3667
ASV_6000		ASV_3938
ASV_6001		ASV_3939
ASV_6002		ASV_3940
ASV_6003		ASV_3941
ASV_6004		ASV_3942
ASV_6006		ASV_3943
ASV_6008		ASV_3944
ASV_6009		ASV_3945
ASV_6010		ASV_3946
ASV_6011		ASV_3949
ASV_6012		ASV_3950
ASV_6013		ASV_3951
ASV_6014		ASV_3952
ASV_6015		ASV_3953
ASV_6016		ASV_3954
ASV_6017		ASV_3955
ASV_6018		ASV_3956
ASV_6019		ASV_3957
ASV_6020		ASV_3958
ASV_6021		ASV_3959
ASV_6022		ASV_3960
ASV_6023		ASV_3961
ASV_6024		ASV_4265
ASV_6025		ASV_4268
ASV_6026		ASV_4290
ASV_6027		ASV_4292
ASV_6028		ASV_4293
ASV_6029		ASV_4294
ASV_6030		ASV_4295
ASV_6031		ASV_4297
ASV_6032		ASV_4298
ASV_6033		ASV_4299
ASV_6034		ASV_4300
ASV_6637		ASV_4301
ASV_6638		ASV_4302
ASV_6639		ASV_4303
ASV_6640		ASV_4304
ASV_6641		ASV_4305
ASV_6642		ASV_4306
ASV_6643		ASV_4307
ASV_6645		ASV_4308
ASV_6646		ASV_4310
ASV_6647		ASV_4311
ASV_6649		ASV_4312
ASV_6650		ASV_4313
ASV_6651		ASV_4314
ASV_6652		ASV_4315
ASV_6653		ASV_4316
ASV_6654		ASV_4780
ASV_6655		ASV_4781
ASV_6656		ASV_4782
ASV_6657		ASV_4783
ASV_6658		ASV_4784
ASV_6659		ASV_4785
ASV_6660		ASV_4786
ASV_6661		ASV_4787
ASV_6663		ASV_4788
ASV_6664		ASV_4789
ASV_6665		ASV_4790
ASV_6666		ASV_4791
ASV_6667		ASV_4792
ASV_6668		ASV_4793
ASV_6669		ASV_4795
ASV_6670		ASV_4797
ASV_6671		ASV_4798
ASV_6672		ASV_4799
ASV_6673		ASV_4800
ASV_6674		ASV_4801
ASV_6675		ASV_4802
ASV_6676		ASV_4804
ASV_6677		ASV_4805
ASV_6678		ASV_4806
ASV_6681		ASV_4807
ASV_6682		ASV_4808
ASV_6683		ASV_4810
ASV_6684		ASV_4811
ASV_6685		ASV_4812
ASV_6686		ASV_4815
ASV_6687		ASV_4816
ASV_6688		ASV_4817
ASV_6689		ASV_4818
ASV_6690		ASV_4819
ASV_6691		ASV_4820
ASV_6692		ASV_4821
ASV_6693		ASV_4822
ASV_6694		ASV_4823
ASV_6696		ASV_4824
ASV_6697		ASV_4825
ASV_6698		ASV_4826
ASV_12947		ASV_4828
ASV_12948		ASV_4829
ASV_12949		ASV_5199
ASV_12950		ASV_5254
ASV_12951		ASV_5445
ASV_12952		ASV_5446
ASV_12953		ASV_5447
ASV_12955		ASV_5448
ASV_12956		ASV_5449
ASV_12957		ASV_5450
ASV_12958		ASV_5451
ASV_12959		ASV_5452
ASV_12960		ASV_5453
ASV_12961		ASV_5454
ASV_12962		ASV_5457
ASV_12963		ASV_5458
ASV_12964		ASV_5459
ASV_12965		ASV_5460
ASV_12966		ASV_5462
ASV_12967		ASV_5463
ASV_12968		ASV_5464
ASV_12969		ASV_5465
ASV_12970		ASV_5466
ASV_12971		ASV_5467
ASV_12972		ASV_5468
ASV_12973		ASV_5469
ASV_12974		ASV_5470
ASV_12975		ASV_5471
ASV_12976		ASV_5472
ASV_12977		ASV_5473
ASV_12978		ASV_5474
ASV_12979		ASV_5475
ASV_12980		ASV_5476
ASV_12981		ASV_5477
ASV_12982		ASV_5478
ASV_12983		ASV_5479
ASV_12984		ASV_5480
ASV_12985		ASV_5481
ASV_12986		ASV_5482
ASV_12987		ASV_5483
ASV_12988		ASV_5484
ASV_12989		ASV_5486
ASV_12990		ASV_5487
ASV_12991		ASV_5489
ASV_12992		ASV_5490
ASV_12993		ASV_5491
ASV_12994		ASV_5492
ASV_12995		ASV_5493
ASV_12996		ASV_5494
ASV_12997		ASV_5495
ASV_12998		ASV_5496
ASV_12999		ASV_5497
ASV_13000		ASV_5498
ASV_13001		ASV_5499
ASV_13002		ASV_5500
ASV_13003		ASV_5501
ASV_13004		ASV_6138
ASV_13005		ASV_6451
ASV_13006		ASV_6452
ASV_13007		ASV_6453
ASV_13008		ASV_6454
ASV_13009		ASV_6455
ASV_13011		ASV_6456
ASV_13012		ASV_6457
ASV_13015		ASV_6458
ASV_13016		ASV_6459
ASV_13017		ASV_6460
ASV_13019		ASV_6461
ASV_13020		ASV_6463
ASV_13021		ASV_6464
ASV_13022		ASV_6465
ASV_13023		ASV_6467
ASV_13024		ASV_6468
ASV_13025		ASV_6469
ASV_13026		ASV_6470
ASV_13027		ASV_6471
ASV_13028		ASV_6472
ASV_13029		ASV_6473
ASV_13030		ASV_6474
ASV_13031		ASV_6475
ASV_13032		ASV_6476
ASV_13033		ASV_6477
ASV_13034		ASV_6478
ASV_3561		ASV_6479
ASV_3562		ASV_6480
ASV_3563		ASV_6481
ASV_3565		ASV_6482
ASV_3566		ASV_6483
ASV_3567		ASV_6484
ASV_3568		ASV_6485
ASV_3569		ASV_6486
ASV_3570		ASV_6487
ASV_3571		ASV_6488
ASV_3572		ASV_6489
ASV_3573		ASV_6490
ASV_3574		ASV_6491
ASV_3576		ASV_6492
ASV_3577		ASV_6495
ASV_3578
ASV_3579
ASV_3580
ASV_3582
ASV_3583
ASV_3584
ASV_3586
ASV_3587
ASV_3588
ASV_3590
ASV_3592
ASV_3593
ASV_3594
ASV_3595
ASV_3596
ASV_3597
ASV_3598
ASV_3599
ASV_3600
ASV_3601
ASV_3602
ASV_3604
ASV_3605
ASV_3606
ASV_3607
ASV_3608
ASV_3609
ASV_3610
ASV_3611
ASV_3612
ASV_3613
ASV_3614
ASV_3616
ASV_3617
ASV_3618
ASV_3619
ASV_3620
ASV_3621
ASV_3622
ASV_3623
ASV_3824
ASV_3825
ASV_3826
ASV_3829
ASV_3831
ASV_3835
ASV_3836
ASV_3839
ASV_12947
ASV_12948
ASV_12949
ASV_12950
ASV_12951
ASV_12952
ASV_12953
ASV_12955
ASV_12956
ASV_12957
ASV_12958
ASV_12959
ASV_12960
ASV_12961
ASV_12962
ASV_12963
ASV_12964
ASV_12965
ASV_12966
ASV_12967
ASV_12968
ASV_12969
ASV_12970
ASV_12971
ASV_12972
ASV_12973
ASV_12974
ASV_12975
ASV_12976
ASV_12977
ASV_12978
ASV_12979
ASV_12980
ASV_12981
ASV_12982
ASV_12983
ASV_12984
ASV_12985
ASV_12986
ASV_12987
ASV_12988
ASV_12989
ASV_12990
ASV_12991
ASV_320
ASV_324
ASV_456
ASV_496
ASV_545
ASV_560
ASV_663
ASV_668
ASV_682
ASV_698
ASV_703
ASV_704
ASV_719
ASV_723
ASV_725
ASV_726
ASV_743
ASV_744
ASV_748
ASV_767
ASV_799
ASV_842
ASV_843
ASV_844
ASV_849
ASV_857
ASV_866
ASV_879
ASV_880
ASV_897
ASV_909
ASV_916
ASV_917
ASV_918
ASV_926
ASV_927
ASV_928
ASV_933
ASV_960
ASV_961
ASV_963
ASV_968
ASV_969
ASV_978
ASV_979
ASV_989
ASV_990
ASV_991
ASV_1012
ASV_1015
ASV_1035
ASV_1045
ASV_1060
ASV_1069
ASV_1070
ASV_1080
ASV_1081
ASV_1083
ASV_1084
ASV_1093
ASV_1094
ASV_1095
ASV_1096
ASV_1105
ASV_1125
ASV_1144
ASV_1159
ASV_1161
ASV_1170
ASV_1171
ASV_1172
ASV_1188
ASV_1205
ASV_1219
ASV_1223
ASV_1225
ASV_1244
ASV_1245
ASV_1246
ASV_1247
ASV_1248
ASV_1258
ASV_1271
ASV_1274
ASV_1283
ASV_1284
ASV_1285
ASV_1287
ASV_1304
ASV_1305
ASV_1306
ASV_1307
ASV_1308
ASV_1326
ASV_1328
ASV_1330
ASV_1331
ASV_1332
ASV_1333
ASV_1352
ASV_1383
ASV_1384
ASV_1385
ASV_1386
ASV_1387
ASV_1388
ASV_1389
ASV_1413
ASV_1414
ASV_1415
ASV_1417
ASV_1418
ASV_1432
ASV_1436
ASV_1456
ASV_1458
ASV_1486
ASV_1488
ASV_1489
ASV_1503
ASV_1507
ASV_1532
ASV_1551
ASV_1552
ASV_2756
ASV_2757
ASV_2759
ASV_2760
ASV_2761
ASV_2763
ASV_2764
ASV_2853
ASV_2854
ASV_2855
ASV_2856
ASV_2857
ASV_2858
ASV_2859
ASV_2860
ASV_2861
ASV_2862
ASV_2863
ASV_2864
ASV_2865
ASV_2866
ASV_2867
ASV_2868
ASV_2869
ASV_2870
ASV_2871
ASV_2872
ASV_2873
ASV_2874
ASV_2875
ASV_2876
ASV_2877
ASV_2878
ASV_2879
ASV_2880
ASV_2882
ASV_2883
ASV_2884
ASV_2885
ASV_2886
ASV_2888
ASV_2889
ASV_2890
ASV_2891
ASV_2973
ASV_2974
ASV_2975
ASV_2978
ASV_2979
ASV_2980
ASV_2981
ASV_2983
ASV_2984
ASV_2985
ASV_2986
ASV_2987
ASV_2988
ASV_2989
ASV_2990
ASV_2991
ASV_2993
ASV_2994
ASV_2995
ASV_2996
ASV_2997
ASV_2998
ASV_2999
ASV_3000
ASV_3001
ASV_3002
ASV_3003
ASV_3004
ASV_3006
ASV_3007
ASV_3008
ASV_3009
ASV_3011
ASV_3012
ASV_3121
ASV_3122
ASV_3124
ASV_3132
ASV_3135
ASV_3136
ASV_3138
ASV_3139
ASV_3140
ASV_3141
ASV_3142
ASV_3143
ASV_3144
ASV_3145
ASV_3146
ASV_3147
ASV_3148
ASV_3149
ASV_3151
ASV_3152
ASV_3153
ASV_3154
ASV_3155
ASV_3157
ASV_3158
ASV_3159
ASV_3161
ASV_3162
ASV_3163
ASV_3164
ASV_3165
ASV_3166
ASV_3167
ASV_3168
ASV_3169
ASV_3171
